# Supplementary material for: Changes in alpha-amylase activity, concentration and isoforms in pigs after an experimental acute stress model: an exploratory study
Source: PubMed Central journal article supplement (PMC6116453; doi:10.1186/s12917-018-1581-2), 2018-08-29

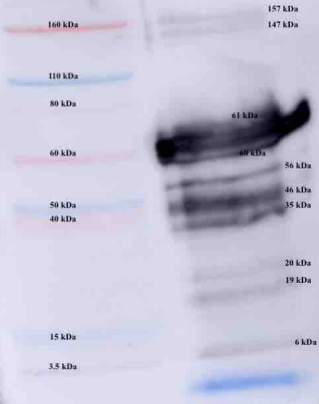

Supplement: 12917_2018_1581_MOESM1_ESM.pdf [file 12917_2018_1581_MOESM1_ESM.pdf]
